# Supplementary material for: Unsaturated Polyester Resin Nanocomposites Based on Post-Consumer Polyethylene Terephthalate
Source: MDPI journal article supplement (doi:10.3390/polym14081602), 2022-04-14
Supplement: s1 [file s1]

# Unsaturated Polyester Resin Nanocomposites Based on Post-Consumer Polyethylene Terephthalate

Kirill Kirshanov, Roman Toms, Pavel Melnikov \* and Alexander Gervald

M.V. Lomonosov Institute of Fine Chemical Technologies, MIREA—Russian Technological University,  
119571 Moscow, Russia; kirill\_kirshanov@mail.ru (K.K.); toms.roman@gmail.com (R.T.); gervald@bk.ru (A.G.)  
\* Correspondence: melnikovsoft@mail.ru

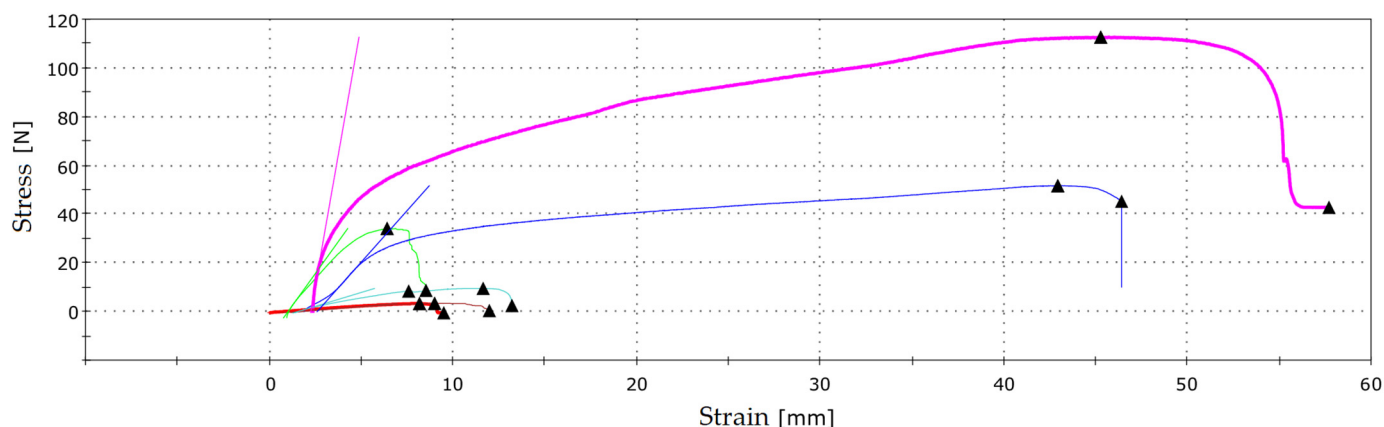

**Figure S1.** Stress-strain curves of UPR samples: (1) UPR-1 without  $\text{TiO}_2$ ; (2) UPR-1 with  $\text{TiO}_2$ ; (3) UPR-2 without  $\text{TiO}_2$ ; (4) UPR-2 with  $\text{TiO}_2$ ; (5) UPR-3 without  $\text{TiO}_2$ ; (6) UPR-3 with  $\text{TiO}_2$ .
